# Supplementary material for: Informatics in Undergraduate Medical Education: Analysis of Competency Frameworks and Practices Across North America
Source: PubMed Central journal article supplement (PMC9516378; doi:10.2196/39794), 2022-09-13

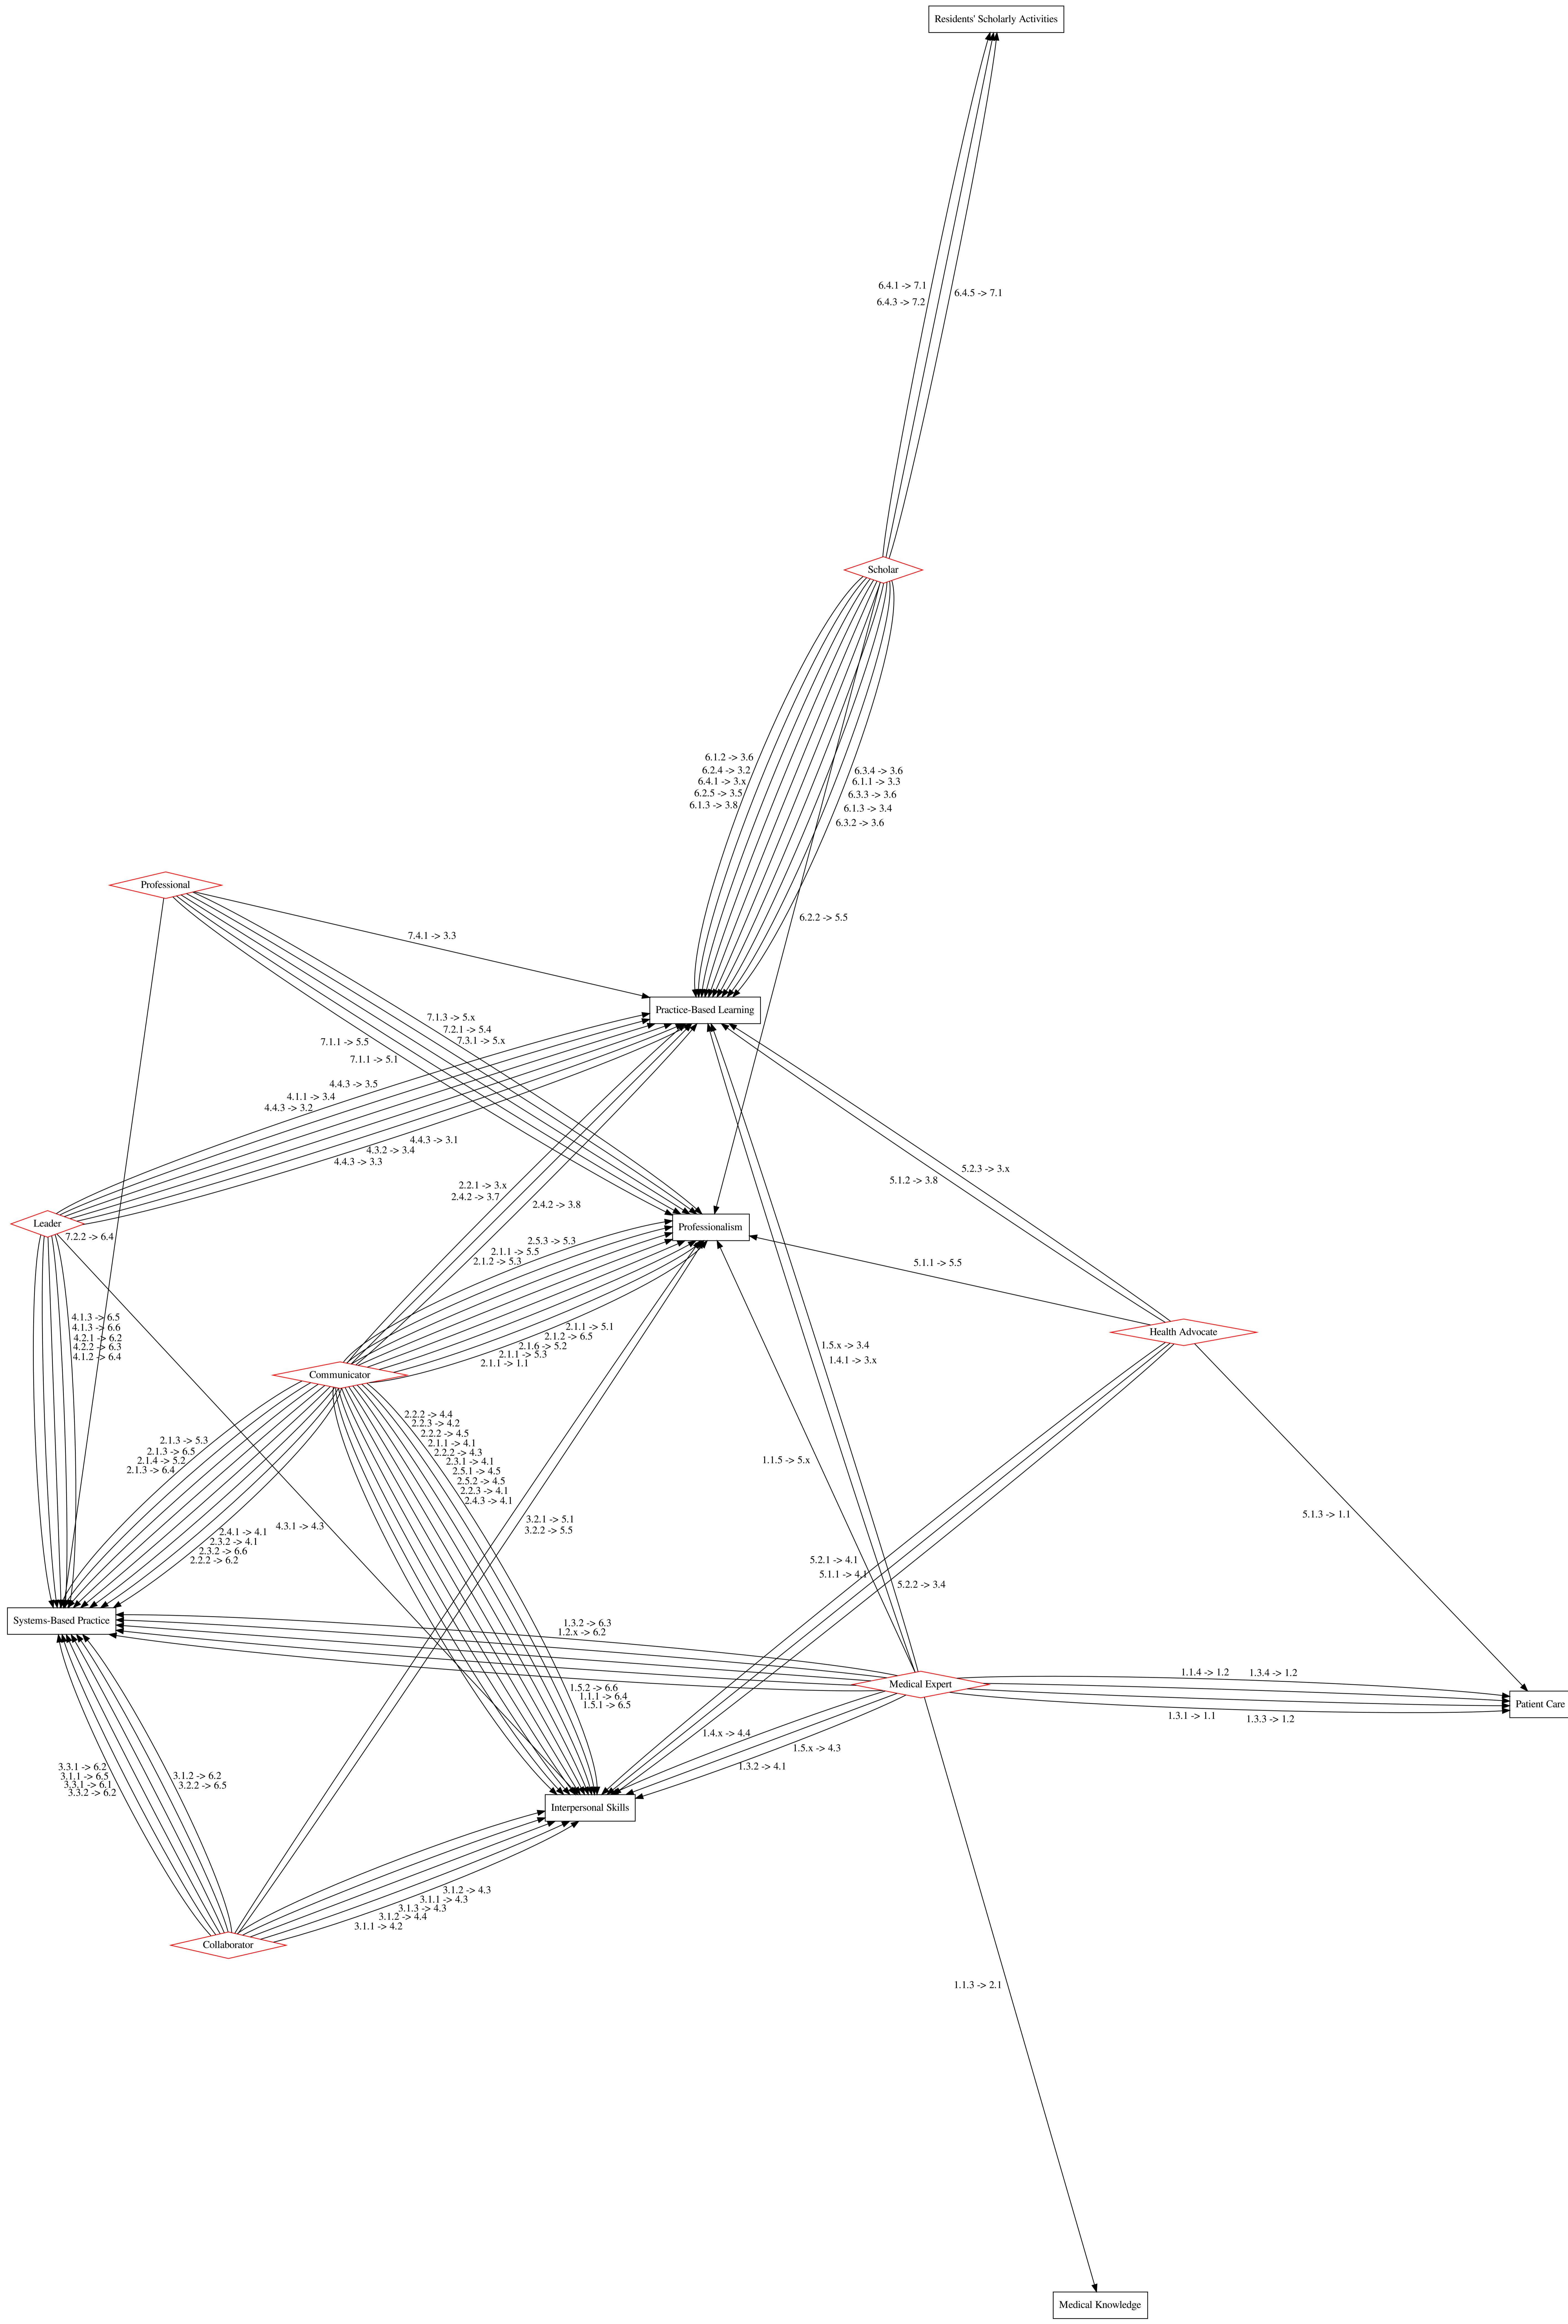

Supplement: mededu_v8i3e39794_app1.pdf [file mededu_v8i3e39794_app1.pdf]
